# Supplementary material for: A bio-inspired microstructure induced by slow injection moulding of cylindrical block copolymers
Source: Royal Society of Chemistry journal article supplement (doi:10.1039/c4sm00884g), 2014-01-01

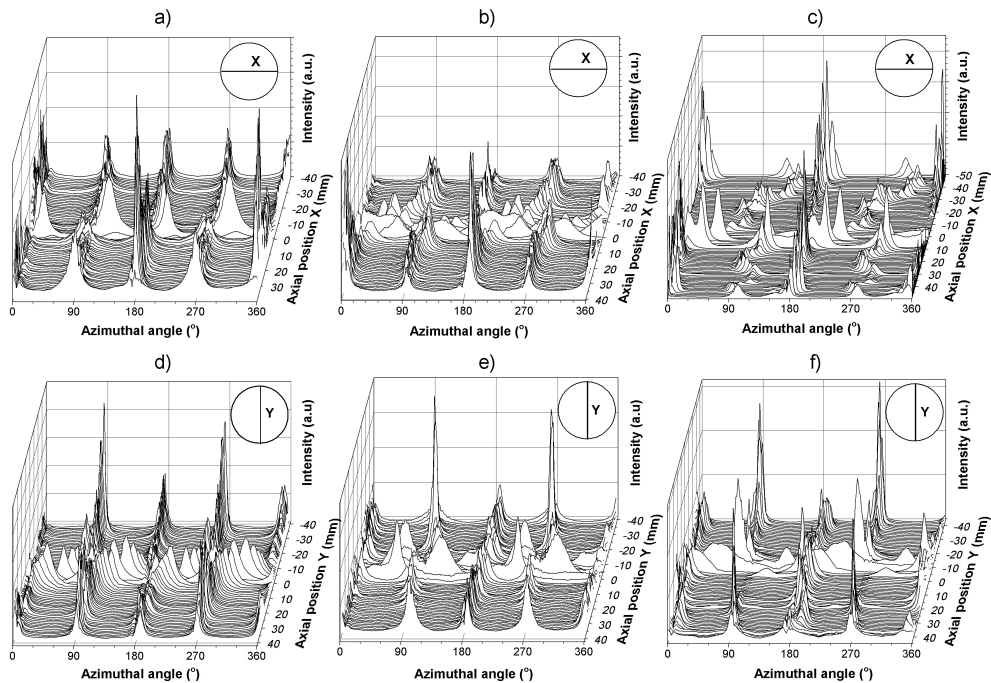

Supplement: c4sm00884g1.pdf [file c4sm00884g1.pdf]
